# Supplementary material for: Obesity, Twin Pregnancy, and the Role of Assisted Reproductive Technology
Source: PubMed Central journal article supplement (PMC10777255; doi:10.1001/jamanetworkopen.2023.50934), 2024-01-09
Supplement: jamanetwopen-e2350934-s002.pdf [file jamanetwopen-e2350934-s002.pdf]

## Data Sharing Statement

Bone. Obesity, Twin Pregnancy, and the Role of Assisted Reproductive Technology. *JAMA Netw Open*. Published January 09, 2024. doi:10.1001/jamanetworkopen.2023.50934

### Data

**Data available:** No

### Additional Information

**Explanation for why data not available:** This data is property of Population Data British Columbia and is available from them upon request.
